# Supplementary material for: NADPH-dependent thioredoxin reductase C plays a role in nonhost disease resistance against Pseudomonas syringae pathogens by regulating chloroplast-generated reactive oxygen species
Source: PeerJ journal article supplement (doi:10.7717/peerj.1938), 2016-04-26

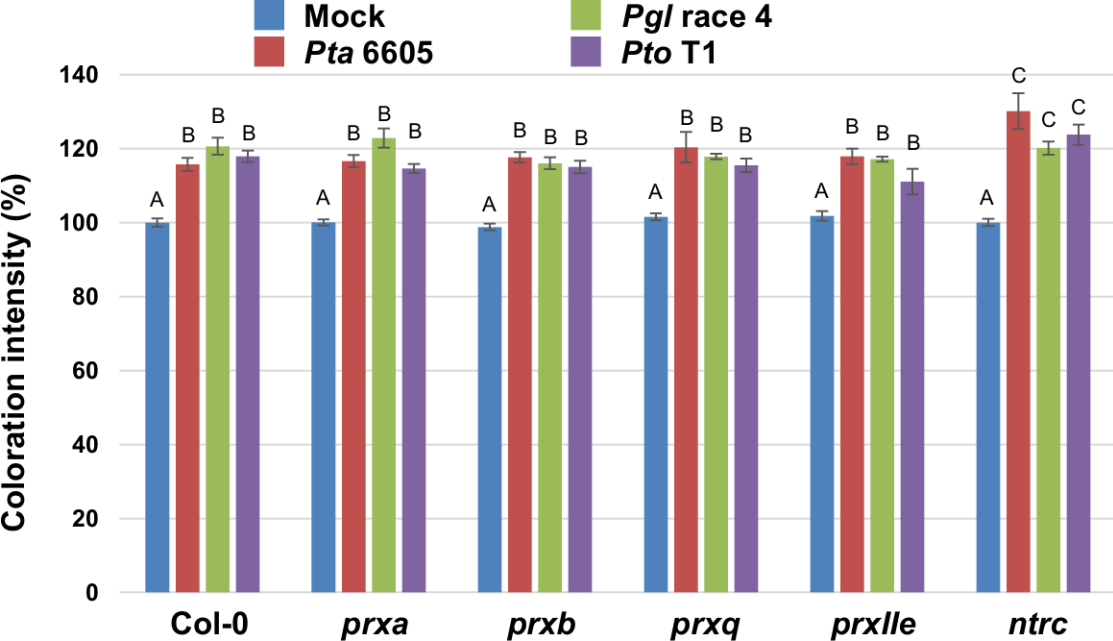

Supplement: FigS2.pdf [file FigS2.pdf]
